# Supplementary material
Source: PubMed Central journal article supplement (PMC5783638)
Supplement: NIHMS882636-supplement-supplement_1.pdf [file NIHMS882636-supplement-supplement_1.pdf]

## Supplement 1

### nuMoM2b Study Definitions of Hypertensive Disorders of Pregnancy

This supplement provides nuMoM2b study definitions of hypertensive disorders of pregnancy:

Exhibit S1.1 shows nuMoM2b definitions of hypertension and proteinuria at baseline (prior to pregnancy or prior to 20<sup>0</sup> weeks gestation).

Exhibit S1.2 gives definitions of HELLP syndrome and eclampsia, which are new onset hypertensive disorders (occurring at or after 20<sup>0</sup> weeks gestation). These definitions are applicable to all participants irrespective of baseline group (chronic hypertension, baseline proteinuria, both, neither).

Exhibit S1.3 provides a table of definitions of gestational hypertension, mild preeclampsia, severe preeclampsia, and superimposed preeclampsia, according to baseline group. Shown are the baseline groups, applicable diagnoses, and nuMoM2b clinical criteria (at or after 20<sup>0</sup> weeks of gestation through 14 days postpartum) for these new onset maternal hypertensive disorders. In Section A, the occurrence of new onset hypertension (Section A.1) plus one or more of the criteria marked with an 'X' in Section A.2 establishes the diagnosis of preeclampsia. Given a diagnosis of preeclampsia, the occurrence of any criterion marked with an 'S' establishes the preeclampsia as severe; otherwise the diagnosis is mild preeclampsia. Note that some criteria, denoted with 'X, S' have a dual role as indicators of preeclampsia and of severe preeclampsia given a diagnosis of preeclampsia.

Abbreviations: SBP = systolic blood pressure; DBP = diastolic blood pressure

## Exhibit S1.1 – Baseline hypertension and proteinuria

**Chronic hypertension (CHTN)** – (1) a diagnosis of hypertension prior to pregnancy or (2) hypertension (systolic  $\geq 140$  mmHg OR diastolic  $\geq 90$  mmHg on two occasions at least 6 hours apart or on one occasion followed by antihypertensive medication therapy) documented prior to pregnancy or prior to 20<sup>0</sup> weeks gestation.

**Baseline proteinuria  $\geq 300$  mg/ 24hr** – total protein  $\geq 300$  mg in a 24-hour urine collection documented prior to pregnancy or prior to 20<sup>0</sup> weeks gestation.

## Exhibit S1.2 – New-onset hypertensive disorders (occurring at or after 20<sup>0</sup> weeks of gestation through 14 days postpartum) applicable to all participants irrespective of baseline status regarding chronic hypertension (CHTN) and proteinuria

**HELLP syndrome** – the occurrence of all of the following criteria:

- a. Hemolysis – evidenced by (1) serum total bilirubin  $\geq 1.2$  mg/dL (20  $\mu$ mol/L), (2) serum lactate dehydrogenase (LDH)  $\geq 600$  IU/L, or (3) hemolysis on peripheral smear
- b. Thrombocytopenia (platelet count  $< 100,000$  /mm<sup>3</sup>)
- c. Serum aspartate aminotransferase (AST)  $\geq 100$  IU/L

**Eclampsia** – the occurrence of a seizure without another known cause.

## Exhibit S1.3 – nuMoM2b definitions for new onset hypertensive disorders, by baseline status regarding chronic hypertension (CHTN) and proteinuria

**Baseline groups, applicable diagnoses, and nuMoM2b clinical criteria (at or after 20<sup>0</sup> weeks of gestation through 14 days postpartum) for new onset maternal hypertensive disorders**

---

### A. Participants without CHTN or baseline proteinuria $\geq 300$ mg/ 24hr

#### 1. Gestational hypertension – the occurrence of new onset hypertension, defined as:

- a. SBP  $\geq 140$  or DBP  $\geq 90$  on 2 occasions  $\geq 6$ hr apart or 1 occasion with subsequent antihypertensive therapy, excluding blood pressures recorded during the second stage of labor

#### 2. Preeclampsia – the occurrence of (1) new onset hypertension plus one or more criteria marked with an "X" below, or (2) HELLP syndrome

**Severe preeclampsia** – (1) a diagnosis of preeclampsia plus one or more criteria marked with an "S" below, or (2) HELLP syndrome

**Mild preeclampsia** – a diagnosis of preeclampsia that does not meet criteria for severe preeclampsia

- |    |                                                                                                                                                                                                                    |      |
|----|--------------------------------------------------------------------------------------------------------------------------------------------------------------------------------------------------------------------|------|
| a. | Proteinuria $\geq 300$ mg/ 24hr; or, if no 24-hour urine protein available, protein/creatinine ratio $\geq 0.3$ or dipstick $\geq 2+$                                                                              | X    |
| b. | Thrombocytopenia (platelet count $< 100,000$ /mm <sup>3</sup> )                                                                                                                                                    | X, S |
| c. | Pulmonary edema                                                                                                                                                                                                    | X, S |
| d. | Severe hypertension: SBP $\geq 160$ or DBP $\geq 110$ on 2 occasions $\geq 6$ hr apart or 1 occasion with subsequent antihypertensive therapy, excluding blood pressures recorded during the second stage of labor | S    |
| e. | Proteinuria $\geq 5,000$ mg/ 24hr                                                                                                                                                                                  | S    |
| f. | Oliguria (urine output $< 500$ mL/ 24hr)                                                                                                                                                                           | S    |
| g. | Severe headache                                                                                                                                                                                                    | S    |
| h. | Epigastric pain                                                                                                                                                                                                    | S    |
| i. | Fetal growth restriction (antenatal diagnosis; operationalized as estimated fetal weight $\leq 10$ th percentile for gestational age by ultrasound examination)                                                    | S    |

**Exhibit S1.3 (cont.) – nuMoM2b a definitions for new onset hypertensive disorders, by baseline status regarding chronic hypertension (CHTN) and proteinuria**

**Baseline groups, applicable diagnoses, and nuMoM2b clinical criteria (at or after 20<sup>0</sup> weeks of gestation through 14 days postpartum) for new onset maternal hypertensive disorders**

---

**B. Participants with baseline proteinuria  $\geq 300$  mg/ 24hr only**

**1. Gestational hypertension – the occurrence of new onset hypertension, defined as:**

- a. SBP  $\geq 140$  or DBP  $\geq 90$  on 2 occasions  $\geq 6$ hr apart or 1 occasion with subsequent antihypertensive therapy, excluding blood pressures recorded during the second stage of labor

**2. Superimposed preeclampsia – the occurrence of one or more of the following:**

- a. Sudden increase in proteinuria (5 times the baseline value, or 2 times a baseline value of  $\geq 5,000$  mg/ 24hr)
- b. Thrombocytopenia (platelet count  $< 100,000$  /mm<sup>3</sup>)
- c. Serum aspartate aminotransferase (AST)  $\geq 100$  IU/L
- d. Severe headache
- e. Epigastric pain

NOTE: the occurrence of HELLP satisfies superimposed preeclampsia criteria B.2.b and B.2.c

**C. Participants with CHTN only**

**1. Superimposed preeclampsia – the occurrence of one or more of the following:**

- a. Proteinuria  $\geq 300$  mg/ 24hr; or, if no 24-hour urine protein available, protein/creatinine ratio  $\geq 0.3$  or dipstick  $\geq 2+$
- b. Thrombocytopenia (platelet count  $< 100,000$  /mm<sup>3</sup>)

NOTE: the occurrence of HELLP satisfies superimposed preeclampsia criterion C.1.b

**D. Participants with CHTN and baseline proteinuria  $\geq 300$  mg/ 24hr**

**1. Superimposed preeclampsia – the occurrence of one or more of the following:**

- a. Worsening hypertension, as shown by two diastolic blood pressures  $\geq 110$  mm Hg taken four hours apart in the week before delivery, excluding blood pressures recorded during the second stage of labor; AND any of these findings:
  - i. Sudden increase in proteinuria (5 times the baseline value, or 2 times a baseline value of  $\geq 5,000$  mg/ 24hr)
  - ii. Severe headache
  - iii. Epigastric pain
- b. Thrombocytopenia (platelet count  $< 100,000$  /mm<sup>3</sup>)
- c. Serum aspartate aminotransferase (AST)  $\geq 100$  IU/L

NOTE: the occurrence of HELLP satisfies superimposed preeclampsia criteria D.1.b and D.1.c
